# Supplementary material for: The incidence of cerebral amyloid angiopathy in surgically treated intracranial hemorrhage in the Chinese population
Source: Springer Nature journal article supplement (doi:10.1007/s10143-013-0474-x), 2013-06-13
Supplement: MOESM1 [file 10143_2013_474_MOESM1_ESM.doc]

| Beijing Tiantan Hospital Affiliated to Capital Medical University | Zhao Ji-Zong MD |
| --- | --- |
| Chengde Centrol Hospital | QiaonJian-Yong MD |
| The First Hospital of Shijiangzhuang City | Nie Jian-Gang MD |
| First Affiliated Hospital of Medical College of Xi’an Jiaotong University | Wang Mao-De MD |
| Henan Provincial People’s Hospital | Shi Xi-Wen MD |
| Xijing Hospital, The Fourth Military Medical University | Fei Zhou MD |
| Peking Union Medical College Hospital | Wang Ren-Zhi MD |
| Siping Central Hospital | Chang Zhi-Tian MD |
| Yangzhou Hongquan Hospital | Hu Guo-Qing MD |
| Peking University Third Hospital | Wang Zhen-Yu MD |
| Liangxiang Hospital of Beijing Fangshan District | Cui Feng-Qi |
| Beijing Pinggu District Hospital | Wang Cai-Yong |
| General Hospital of Tianjin Medical University | Yang Shu-Yuan MD |
| Ruijin Hospital,Shanghai Jiao Tong University School of Medical | Shen Jian-Kang MD |
| Renji Hospital, Shanghai Jiao Tong University School of Medical | Jiang Ji-Yao MD |
| The Second Affiliated Hospital of Soochow University | Lan Qing MD |
| Nanjing Drum Tower Hospital The Affiliated Hospital of Nanjing University Medical School | Huang Yu-Jie MD |
| Jiangsu Province Hospital | Fu Zhen MD |
| Jiangsu Jiangyin People’s Hospital | Gao Heng MD |
| Tongzhou District Third People’s Hospital, Nantong City Jiangsu Province | Huang Pan-Bing MD |
| The First Affiliated Hospital of Zhengzhou University | Song Lai-Jun MD |
| Fujian Medical University Union Hospital | Yang Wei-Zhong MD |
| Shanghai Jiao Tong University Affiliated First People's Hospital | Zhu Xiao-Jiang MD |
| Beijing Chaoyang Hospital Affiliated to Capital Medical University | Zhao Qihuang, MD |
| Beijing Youyi Hospital Affiliated to Capital Medical University | Liu Cang, MD |
| The Second Affiliated Hospital of Shandong University | Qu Chun-Cheng MD |
| The First Affiliated Hospital of Wenzhou Medical College | Zhu Ge Qi-Chuan MD |
| Haikou Municipal Hospital, Xiangya Haikou Hospital of Central South University | Shi Ke-Shan MD |
| Liaocheng People’s Hospital, Medical School of Liaocheng, Taishan Medical University | Wang Ji-Yao MD |
| QiLu Hospital of Shandong University | Li Xin-Gang MD |
| The Affiliated Hospital of Xuzhou Medical College | Yu Ru-Tong MD |
| The Luhe Teaching Hospital of Capital Medical University | Tian Li-Xue MD |
| The General Hospital of Jinan Army | Zhu Wei-Jie MD |
| Wangjing Hospital of China Academy of Chinese Medical Sciences | Che Wan-Min MD |
| Tongji Hospital, Tongji Medical College, Huazhong University of Science and Technology | Lei Ting MD |
| Renmin Hospital of Wuhan University | Chen Qian-Xue MD |
| Xiangyang General Hospital | Zhou Yi MD |
| The General Hospital of the People's Liberation Army | Zhou Ding-Biao MD |
| Shanghai Huashan Hospital Fudan University | Zhou Liang-Fu MD |
| Shandong Tai’an Central Hospital | Chang Xin-Ming MD |
| Qingdao Municipal Hospital | Li Chuan-feng MD |
| Wuxi Municipal No.2 Hospital Affiliated to Nanjing Medical University | Lu Xiao-Jie MD |
| Inner Mongolia National University Hospital | Sun Zhi-Gang MD |
| Tang Du Hospital | Zhao Zhen-Wei MD |
| The Third Affiliated Hospital of Wenzhou Medical College | Yang Rui-Jiang MD |
| Southwest Hospital, Third Military Medical University | Feng Hua MD |
| The First hospital affiliated to China Medical University | Wang Yun-Jie MD |
| Xinjiang Uygur Autonomous Region People’s Hospital | Yang Xiao-Peng MD |
| Dalian fishery industry corporation affiliated hospital | Yang Rui MD |
| Central hospital of Jinzhou district, Dalian | Han Qing-Shun MD |
| The First hospital affiliated to Dalian Mecial University | Liu Rong-Yao MD |
| Integrated Thrombolysis Center of Liaoning Province | Tang Guang-Hai MD |
| China Meitan General Hospital | Qin Huai-Hai MD |
| The Tibet Autonomous Region People's Hospital | Pu Zhi MD |
| Wuxi Municipal No.2 Hospital Affiliated to Nanjing Medical University | Lu Xiao-Jie MD |
| Jincheng People’s Hospital of Shanxi Province | Hao Zheng-Jia MD |
| The First Affiliated Hospital of Medical School of Zhejiang University | Zhan Ren-Ya MD |
| The Affiliated Hospital of Inner Mongolia Medical College | Wu Wen-Yuan MD |
| The Second Affiliated Hospital of Medical College of Xi’an Jiaotong University | Sun Zhen-Wei MD |
| The Affiliated Hospital of Medical College Qingdao University | Meng Qing-Hai MD |
| The Second Affiliated Hospital of Medical School of Zhejiang University | Zhang Jian-Min |
| Guiyang Medical College Affiliated Hospital | Liu Jian MD |
| Affiliated Hospital Of Jining Medical College | Zhao Wan-Ju MD |
| Chong Qing Daping Hospital,Third Military Medical University | Xu Ming-Hui MD |
| Xinqiao Hospital, Third Military Medical Univeristy | Yang Hui MD |
| Jingzhou People’s Hospital, Hubei Province | Yao Yuan MD |
| Affiliated Hospital of PuTian University | Fang Zhi-min MD |
| The Second Affiliated Hospital, Chongqing Medical University | Chen Wei-Fu MD |
| Linfen People’s Hospital, Shanxi Province | Li Huai-Long |
| The First Affiliated Hospital, Chongqing Medical University | Sun Xiao-Chuan |
| Beijing Tongren Hospital, Capital Medical University | Li Yong MD |
